**A false sense of security**

Mike Rossner

Vol. 183 No. 4, November 17, 2008. Pages 573–574.

In the original article, the following statement is incorrect: “A recent test of the Cadmus image screening service...”.

It should read, “A recent test of the Rigour software processing service...”.
